1 What shapes the continuum of  
2 reproductive isolation?  
3 Lessons from *Heliconius* butterflies.

4

---

5 Mérot C.<sup>1,2</sup>, Salazar C.<sup>3</sup>, Merrill R. M.<sup>4,5</sup>, Jiggins C.<sup>4,5</sup>, Joron M.<sup>1,6</sup>

6

7

8

9 <sup>1</sup> ISYEB UMR 7205, Muséum National d'Histoire Naturelle, 45 rue Buffon, Paris

10 <sup>2</sup> IBIS, Université Laval, 1030 Avenue de la Médecine, Québec, Canada

11 <sup>3</sup> Biology Program, Faculty of Natural Sciences and Mathematics. Universidad del Rosario.  
12 Carrera. 24 No 63C-69, Bogota D.C., 111221. Colombia.

13 <sup>4</sup> Department of Zoology, University of Cambridge, Downing Street, Cambridge, CB2 3EJ,  
14 United Kingdom

15 <sup>5</sup> Smithsonian Tropical Research Institute, MRC 0580-12, Unit 9100 Box 0948, DPO AA  
16 34002-9998

17 <sup>6</sup> Centre d'Ecologie Fonctionnelle et Evolutive, UMR 5175 CNRS - Université de Montpellier  
18 - Université Paul Valéry Montpellier - EPHE, 1919 route de Mende, 34293 Montpellier, France

19

20 Running title: Species Isolation in *Heliconius*

21 Key words: Speciation – Hybrid Sterility- Mate choice – Lepidoptera – Magic trait

22

23

24

25

## 26 **Abstract**

27 The process by which species evolve can be illuminated by investigating barriers that limit gene  
28 flow between taxa. Recent radiations, such as *Heliconius* butterflies, offer the opportunity to  
29 compare isolation between pairs of taxa at different stages of ecological, geographic and  
30 phylogenetic divergence. We carry out a comparative analysis of existing and novel data in  
31 order to quantify the strength and direction of isolating barriers within a well-studied clade of  
32 *Heliconius*. Our results highlight that increased divergence is associated with the accumulation  
33 of stronger and more numerous barriers to gene flow. Wing pattern is both under natural  
34 selection for Müllerian mimicry and involved in mate choice, and therefore underlies several  
35 isolating barriers. However, pairs which share a similar wing pattern, also display strong  
36 reproductive isolation mediated by traits other than wing pattern. This suggests that, while wing  
37 pattern is a key factor for early stages of divergence, it is not essential at a higher level.  
38 Additional factors including habitat isolation, hybrid sterility and chemically-mediated mate  
39 choice are associated with complete speciation. Therefore, although most previous work has  
40 emphasised the role of wing pattern, our comparative results highlight that speciation is a  
41 multidimensional process, whose completion is stabilized by many factors.

42

## 43 **Introduction**

44 Studies of speciation have long contrasted allopatric and sympatric speciation, speciation  
45 through sexual versus natural selection, and ecological versus non-ecological speciation.  
46 However, these contrasts do not always reflect the diversity of processes involved in divergence  
47 and the challenge is to reach an integrated understanding of speciation [1-4]. Species divergence  
48 involves multiple different traits and processes that can lead to reproductive isolation [5]. These  
49 include adaptation to local environmental conditions, pre-mating isolation as well as post-  
50 mating effects that reduce the fitness of hybrids. To untangle the evolutionary processes at play,  
51 it is useful to quantify the relative importance of the factors reducing gene flow between  
52 diverging populations [6].

53

54 Speciation is a continuous process and we can typically only observe the results of divergence  
55 at a specific stage, not the process in its entirety. For instance, incompatibilities between extant  
56 species may not reveal the ecological and evolutionary forces initially causing phenotypic  
57 divergence [7]. Conversely, ecotypes or subspecies at early divergence may shed light on  
58 factors favouring early divergence but speciation is not a necessary outcome [8, 9] and the  
59 challenge of speciation with gene flow might not be its initiation but its progression and  
60 completion [10]. In that context, a useful way to study speciation as a continuous process is to  
61 compare multiple pairs of incipient or closely-related species which vary in their extent of  
62 divergence, possibly depicting stages along the so-called speciation continuum [9, 11-14].

63

64 With a large diversity of recently diverged species and sub-species, the radiation of *Heliconius*  
65 butterflies is an excellent system for studying speciation [15]. Within *Heliconius*, the two sister  
66 clades, melpomene clade and cydno clade each contains a large number of local representatives  
67 across the Neotropics (Fig 1). They provide replicate pairs of sister-taxa distributed along the

68 speciation continuum, notably spanning the “grey zone of speciation” [14], providing an  
69 opportunity to assess the factor shaping reproductive isolation along the speciation process.

70

71 *H. melpomene* is considered a single taxonomic species but comprises populations with  
72 significant genetic differentiation between western and eastern populations on either side of the  
73 Andes [16, 17]. The cydno clade includes four taxonomic species, *H. cydno*, *H. pachinus*, *H.*  
74 *timareta* and *H. heurippa*. Across their range, representatives of the cydno clade are typically  
75 broadly sympatric with *H. melpomene* and hybridize at low frequency [18-20], resulting in  
76 persistent inter-specific admixture across the genome [21].

77

78 Within this clade, the modalities of reproductive isolation have been examined across numerous  
79 studies considering taxa at various levels of divergence, falling into three main categories. First,  
80 pairs of taxa at low divergence, such as sympatric forms of *H. cydno alithea* (Ecuador) [22, 23]  
81 and parapatric subspecies of *H. timareta* (Colombia) [24, 25] or *H. melpomene* (Peru) [26].  
82 Secondly, at intermediate divergence, populations belonging to the same clade (either cydno or  
83 melpomene) but characterized by significant genetic clustering. Within the cydno clade, those  
84 correspond to separate species, such as *H. cydno galanthus* and *H. pachinus* (Costa Rica) [23,  
85 27] or *H. cydno cordula* and *H. heurippa* (Colombia) [28, 29]. Within the melpomene clade,  
86 this includes allopatric subspecies of *H. melpomene* belonging to the eastern and western  
87 lineages (Panama/French Guiana)[30]. Thirdly, comparison of highly-divergent pairs,  
88 involving a population of *H. melpomene* and a representative of the cydno-group, found in  
89 sympatry, parapatry or allopatry (Panama, Colombia, Peru, French Guiana) [28-36].

90

91 Emphasis has been given to behavioural pre-mating isolation, found to be strong in most pairs  
92 of taxa [23, 26, 30, 34]. However, other components of divergence such as habitat preference  
93 [37], hybrid fertility [29, 32], hybrid survival in the wild [36] and hybrid mating success [33]  
94 have also received some attention. Here, to provide an extensive comparison across the whole  
95 clade, we conduct a joint re-analysis of those published data with new data and quantify the  
96 contribution to reproductive isolation of each isolating component.

97

98 Most studies focus on pairs of species diverging in wing colour pattern. Wing pattern has been  
99 termed a ‘magic trait’ causing speciation, because disruptive selection and assortative mating  
100 operate directly on the same trait, wing pattern, thereby coupling two key forms of reproductive  
101 isolation [30, 36, 38-40]. First, *Heliconius* wing patterns are warning signals under strong  
102 natural selection for Müllerian mimicry [41-44]. Individuals not fitting one of the warning  
103 patterns recognised by predators suffer a higher risk of predation and there is evidence for  
104 selection against immigrant and hybrid wing patterns [36, 41, 42, 45]. Second, wing patterns  
105 are also involved in mate-recognition in *Heliconius*, and males typically preferentially court  
106 females displaying their own colour pattern [22, 26, 30, 33]. The loci controlling colour pattern  
107 appear to be tightly linked to mate preference loci, which may help maintain the association  
108 between signal and preference [23, 35]. Consequently, wing pattern divergence causes  
109 reproductive isolation both through hybrid unfitness and assortative mating, and in *Heliconius*,  
110 speciation is indeed frequently associated with a colour pattern shift [38, 46, 47].

111

112 Cases of mimicry between sibling species were unknown in *Heliconius* until the discovery of  
 113 new cryptic subspecies of *H. timareta* in sympatry with its co-mimic *H. melpomene* in  
 114 Colombia, Ecuador and Peru [20, 31, 48, 49]. Less is known about the mechanisms responsible  
 115 for reproductive isolation between these species pairs with similar wing patterns (co-mimics),  
 116 but this will be important in understanding the role of mimicry shifts in reproductive isolation.  
 117 Indeed, wing-pattern similarity may be predicted to favour hybrid matings as well as increase  
 118 the survival of hybrid adults, and so may weaken both pre-mating and post-mating isolation  
 119 between taxa.

120

121 In this study, we investigate the mechanisms involved in the build-up of reproductive isolation  
 122 by means of a large-scale, comparative analysis on this clade of *Heliconius* butterflies. We  
 123 combine new data with data collected from the existing *Heliconius* literature. The numerous  
 124 studies of *Heliconius* taxon-pairs at various levels of divergence and in various geographic  
 125 contexts allow us to evaluate the relative importance of different isolating barriers and their  
 126 appearance at various stages of divergence. We have applied a unified framework for the  
 127 quantification of isolating barriers that facilitates these comparisons [6]. By contrasting co-  
 128 mimetic vs. non-mimetic pairs of species, we also specifically address the importance of wing-  
 129 pattern as a ‘magic trait’ for reproductive isolation in *Heliconius*.

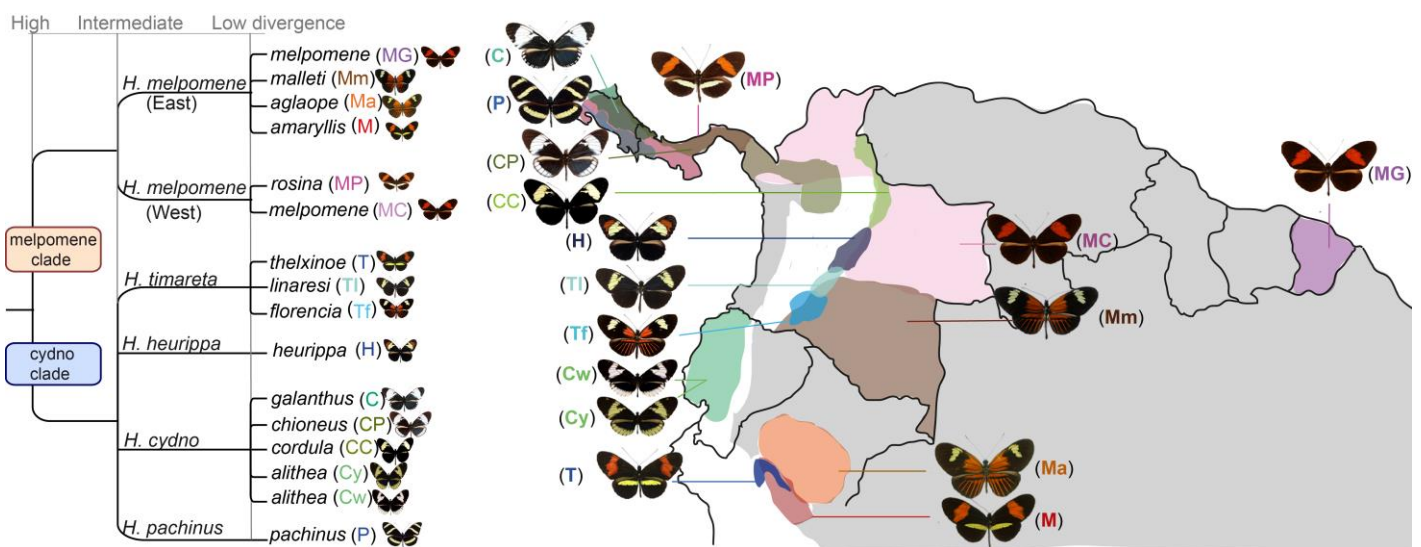

131 **Figure 1: Geographic range and relationships of the taxa included in this study.**

132 *H. m. melpomene* and *H. m. malleti* have a wide range through South America but we chose to represent  
 133 only their range in the country where they were studied. Grey areas represent areas harbouring other  
 134 subspecies of *H. cydno/timareta* and *H. melpomene* which we did not include in our analyses. Phylogeny  
 135 is adapted from [16, 17]. Range localisation is adapted from [52].

136

137

## 138 **Material and methods**

### 139 ***Species studied***

140 We considered published data from all representatives of the cydno clade, *H. cydno*, *H.*  
141 *pachinus*, *H. timareta*, *H. heurippa* and from the two *H. melpomene* lineages (Fig. 1; see all the  
142 references in Table S1 for each pair). New data is provided for the pair of co-mimics *H. t.*  
143 *thelxinoe*/*H. m. amaryllis*, *H. t. florencía*/*H. m. malleti* and three Colombian non-mimetic pairs  
144 *H. heurippa*, *H. c. cordula* and *H. m. melpomene* in supplementary material.

### 145 ***General framework: quantifying the strength of reproductive isolation (RI)***

146 We quantified the strength of reproductive isolation (RI) for each isolating barrier following [6]  
147 inspired by [50, 51]. Briefly, the index *RI* offers a linear quantification of RI associated with  
148 the presence of a given barrier relatively to expectations in the absence of all barriers. It allows  
149 a direct link to gene flow: *RI* = 1 when isolation prevents gene flow, whereas *RI* = 0 if the  
150 probability of gene flow does not differ from expectations without this barrier. Confidence  
151 intervals for the index can be drawn from confidence interval on the data.

152

153 The strength of RI provided by each pre-mating barrier is estimated with the expression:

$$154 \quad RI_{\text{barrier}1} = 1 - 2 \times \frac{H_1}{H_1 + C_1}$$

155 where  $H_1$  is the frequency of heterospecific mating and  $C_1$  the frequency of conspecific mating  
156 (when barrier 1 is the only barrier acting).

157 This is equivalent to:

$$158 \quad RI_{\text{barrier}1} = 1 - \frac{\text{Observed hybridization}_{(\text{with only barrier}1)}}{\text{Expected hybridization}_{(\text{with only barrier}1)}}$$

159

160 The strength of RI associated with each post-mating barrier is evaluated with the same  
161 expression where  $H$  is the fitness of hybrids and  $C$  the fitness of pure individuals. RI was  
162 calculated separately for both directions of crosses (AxB and BxA; female given first). We  
163 summarize hereafter how each barrier was investigated. Detailed methods and calculations are  
164 given in supplementary material and Table S1.

165

### 166 ***Spatial isolation (at small and large scale)***

167 Since some species ranges are poorly known, the geographic overlap was not evaluated  
168 quantitatively. Instead, we provided a qualitative estimate of the level of parapatry, based on  
169 the literature [52] in Table S1 and Fig. 1.

170

171 Although taxa may overlap in range at a broad geographic scale, this does not necessarily entail  
172 equal encounter rates, for instance if relative frequencies differ between microhabitats. For four  
173 pairs of species collected in several locations equally distributed along the transition zone (Fig.  
174 S1), we use raw collection data (assuming equal collecting efforts on both species) as a proxy  
175 for natural encounter rates, and draw an estimate of the expected number of heterospecific vs  
176 conspecific matings which we use to calculate reproductive isolation due to spatial distribution,

177  $RI_{\text{spatial}}$ .

## 178 **Behavioural pre-mating isolating barriers**

179 *Heliconius* males usually patrol the habitat, approach females and perform courtship  
180 characterized by sustained hovering and intense wing flapping over the female. Females can  
181 accept or reject mating [53]. Most studies have investigated male attraction by visual cues (on  
182 models), male preference towards live females, and realised mating. Those three facets of mate  
183 choice were analysed separately to dissect their respective contribution to sexual isolation.  
184 Realised mating, which reflect the multiple aspects of mate choice by both sexes leading to a  
185 mating event, was used for the whole comparison between barriers.

### 186 **Model experiments: male attraction on visual cues**

187 In all studies, male preference for different visual cues has been estimated by presenting a male  
188 or a group of males with a model made with dead female wings dissected and by recording  
189 courtship towards each model.

### 190 **Experiments with live females (LF exp): male preference behaviour based on all cues**

191 In all studies, individually-marked males were monitored for courtship during a short time  
192 interval when presented with a heterospecific and a conspecific freshly emerged, virgin female.

### 193 **Mating experiments: full male-female interaction (M+F)**

194 To investigate mating achievement, most studies have simulated a natural situation, either with  
195 a no-choice experiment in which a virgin female (conspecific or hetero-specific) is presented  
196 to a one male or a group of ten mature males for 48h, or with a tetrad experiment, where four  
197 individuals, one male and one female of each species, were kept until the first mating occurred.

## 198 **Post-mating isolating barriers**

### 199 **Hatch rate and hybrid sterility**

200 In all studies, mated females of crosses and pure females were kept in individual cages with  
201 various fresh shoots of several *Passiflora* species. Eggs were collected on a regular schedule,  
202 stored individually in small plastic cups, identified and checked daily for hatching. For each  
203 female, fertility was defined as the hatch rate, the percentage of egg hatched over the total  
204 number of eggs laid.

### 205 **Hybrid larval fitness**

206 Hybrid survival was recorded only for four pairs (Table S1). In all cases, larvae were raised in  
207 individual plastic containers for the first instar. Then, they were gathered by family group in a  
208 larger box and fed ad libitum on young shoot of *Passiflora* sp. Survival rate was calculated for  
209 each family as the proportion of larvae growing until imago.

### 210 **Hybrid adult fitness**

211 Survival in the wild was tested experimentally only in Panama with paper models of *H. m.*  
212 *rosina/H. c. chioneus* and their F<sub>1</sub> hybrids [36].

213  
214 Hybrid ability of mating has been investigated with no-choice experiment or live-virgin female  
215 experiment in six pairs (Table S1). For Costa Rican *H. cydno* x *H. pachinus* hybrids, mating  
216 success is estimated from experiments with F<sub>1</sub> wing models.

## 217 Results

### 218 *Pre-mating spatial isolation*

219 The highly-divergent species pairs considered here are either sympatric or parapatric but  
220 overlap on a large portion of their range. For four of those, local distribution was finely  
221 quantified in the area of overlap (Fig. S1). As the probability of encounters between species  
222 depends on coexistence within microhabitats, we found that micro-spatial distribution  
223 contributes significantly to RI in both mimetic and non-mimetic pairs ( $RI_{spatial}=0.7-0.8$ , Fig. 2,  
224 Table 1). For instance, *H. c. chioneus* occupies tall forest habitats where its co-mimic *H. sapho*  
225 is abundant, whereas *H. m. rosina* is more frequent in disturbed and edge habitats where *H.*  
226 *erato* is abundant [37, 54]. Similarly, with increasing altitude, *H. t. thelxinoe*, *H. t. florencia* or  
227 *H. heurippa* progressively replace the local *H. melpomene* representative, and are also  
228 associated with closed forested habitat.

229

230 At intermediate divergence, population pairs are mostly geographic replacements of one  
231 another, and do not show any (known) geographic overlap.

232

233 At low divergence, *H. cydno alithea* alternative morphs have a patchy distribution, associated  
234 with their local co-mimics [41], while pairs of populations within *H. melpomene* or *H. timareta*  
235 are geographical races, with narrow hybrid zones where both morphs and hybrids are found.

236

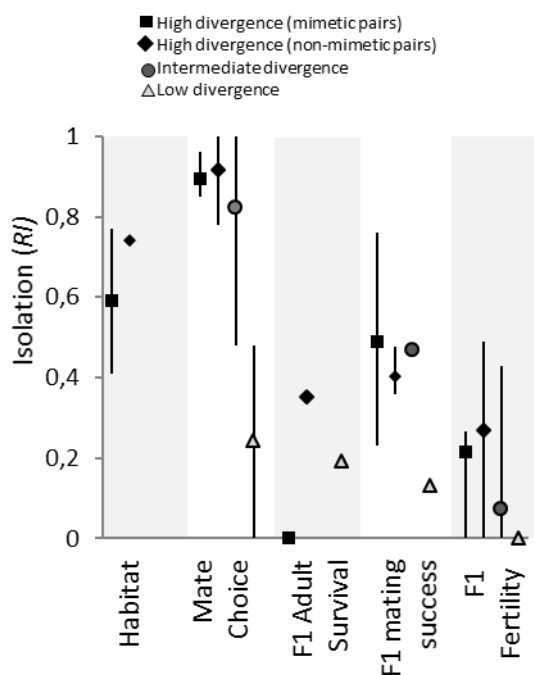

**Figure 2: Mean strength of reproductive isolation for each relevant isolating barrier**  
*RI* associated with each barrier averaged by stage of divergence. The bar range from minimal to maximal values. All detailed values of *RI* are displayed in Table 1

237

238

239 **Table 1: Strength of reproductive isolation associated with each barrier to gene flow**  
 240 *RI* ranges from 0 (non-significant barrier), to 1 (full isolation). For each pair of species, the two lines  
 241 correspond to the two possible directions of heterospecific mating with the female given first. Barriers  
 242 that could not be estimated are not shown. We indicated by a dash barriers that could not be estimated  
 243 but are likely non-significant.

| #1<br>#2               | ♀ X ♂                                                      | Spatial        | Mating       | F <sub>1</sub> egg | F <sub>1</sub> larva | F <sub>1</sub> adult | F <sub>1</sub> mating with #1 | F <sub>1</sub> mating with #2 | F <sub>1</sub> fertility |              |
|------------------------|------------------------------------------------------------|----------------|--------------|--------------------|----------------------|----------------------|-------------------------------|-------------------------------|--------------------------|--------------|
| <b>High divergence</b> | <i>H. c. chioneus</i> (CP)<br><i>H. m. rosina</i> (MP)     | CPxMP<br>MPxCP | 0.73<br>0.73 | 1<br>1             | 0<br>0               |                      | 0.35<br>0.35                  | 0.20<br>0.52                  | 0.31<br>0.13             |              |
|                        | <i>H. c. cordula</i> (CC)<br><i>H. m. melpomene</i> (MC)   | CCxMC<br>MCxCC | -<br>-       | 0.82<br>0.88       | 0<br>0               | 0<br>0               |                               |                               | 0.33<br>0.22             |              |
|                        | <i>H. heurippa</i> (H)<br><i>H. m. melpomene</i> (MC)      | HxMC<br>MCxH   | 0.75<br>0.75 | 0.93<br>0.90       | 0<br>0               | 0<br>0               |                               | 0.44<br>0.75                  | 0.29<br>0.20             | 0.33<br>0    |
|                        | <i>H. c. chioneus</i> (CP)<br><i>H. m. melpomene</i> (MG)  | CPxMG<br>MGxCP |              | 0.78<br>1          | 0<br>0               |                      |                               |                               | 0.49<br>0.33             |              |
|                        | <i>H. t. thelxinoe</i> (T)<br><i>H. m. amaryllis</i> (M)   | TxM<br>MxT     | 0.77<br>0.77 | 0.86<br>0.85       | 0<br>0               | 0<br>0               | -<br>-                        | 0.46<br>0.87                  | 0<br>0                   | 0.32<br>0.08 |
|                        | <i>H. t. florencina</i> (Tf)<br><i>H. m. malleti</i> (Mm)  | TfxMm<br>MmxTf | 0.75<br>0.75 | 0.90<br>0.96       | 0<br>0               |                      | -<br>-                        | 0.52                          | 1                        | 0.33<br>0.19 |
| <b>Intermediate</b>    | <i>H. heurippa</i> (H)<br><i>H. c. cordula</i> (CC)        | CCxH<br>HxCC   |              | 0.56<br>0.98       | 0<br>0               | 0<br>0               |                               |                               | 0<br>0                   |              |
|                        | <i>H. c. galanthus</i> (C)<br><i>H. pachinus</i> (P)       | CxP<br>PxP     |              | 0.91<br>1          | -<br>-               | -<br>-               | 0<br>0                        | 0.94<br>0.94                  | -<br>-                   |              |
|                        | <i>H. m. rosina</i> (MP)<br><i>H. m. melpomene</i> (MG)    | MGxMP<br>MPxMG |              | 1<br>0.48          | 0<br>0               | -<br>-               |                               |                               | 0<br>0.43                |              |
| <b>Low</b>             | <i>H. c. alithea</i><br>white/yellow (Cw/Cy)               | CyxCw<br>CwxCy |              | 0.26<br>0.07       | -<br>-               | -<br>-               | 0.19<br>0.19                  | -<br>-                        | 0.26<br>0.26             | -<br>-       |
|                        | <i>H. t. florencina</i> (Tf)<br><i>H. t. linaresi</i> (Tl) | TfxTl<br>TfxTl |              | 0.02<br>0.48       | 0<br>0               | -<br>-               |                               |                               | 0<br>0                   |              |
|                        | <i>H. m. amaryllis</i> (M)<br><i>H. m. aglaope</i> (Ma)    | MaxM<br>MxMa   |              | 0.40<br>0          | -<br>-               | -<br>-               |                               |                               | -<br>-                   |              |



## 245 **Behavioural pre-mating isolating barriers (Fig.3)**

### 246 Colour pattern model experiments: male preference based on colour

247 At high divergence, isolation due to male preference based on visual cues is strong for pairs  
248 with different colour patterns. It is generally higher in the direction involving *melpomene* males  
249 ( $RI_{colour} = 0.75-0.94$ , except for the Colombian *H. c. cordula* and *H. m. melpomene* pair reaching  
250 only 0.28) than in the other direction (*H. melpomene* X cydno clade males,  $RI_{colour} = 0.35-0.5$ ).  
251 Colour preference is lower between *H. heurippa* and *H. m. melpomene* than between other pairs  
252 diverging in colour pattern ( $RI_{colour} = 0.07/0.2$ ). This might be due to the intermediate pattern of  
253 *H. heurippa*, which includes the red band of *H. m. melpomene*. In the co-mimetic pairs (*H. t.*  
254 *thelxinoe* and *H. m. amaryllis* ; *H. t. florencia* and *H. m. malleti*) males do not discriminate  
255 between models, as expected given the high visual similarity of the two species.

256  
257 At intermediate divergence, colour preference remains an isolating factor although its strength  
258 varies depending on the pair considered.  $RI_{colour}$  estimates can reach 0.85/0.98 between *H. c.*  
259 *galanthus* and *H. pachinus* but only 0.17/0.56 between *H. heurippa* and *H. c. cordula*. It is zero  
260 between the allopatric *H. m. rosina* and *H. m. melpomene*, probably because of the red forewing  
261 band shared by the two subspecies.

262  
263 At low divergence, between *H. t. florencia* and *H. t. linaresi*, some preference is observed,  
264 leading to an estimated  $RI_{colour}$  of 0.27/0.35.

### 266 Experiments with live females: male preference based on all cues

267 At high divergence, male preference for conspecifics is stronger than in the experiments with  
268 models, suggesting that a wider range of proximal cues are available, such as chemical signals  
269 or behavioural cues, and influence male courtship decision leading to a higher RI ( $RI_{male}$   
270  $choice = 0.64-1$ ).

271  
272 The use of proximal vs. long-range visual cues by males seems to depend on the direction of  
273 the hetero-specific interaction: *H. melpomene* males appear to choose based on visual cues  
274 while cydno-clade males show an accentuated choice with live females, possibly reflecting their  
275 response to chemical information (Mérot *et al*, 2015). *H. melpomene* males indeed respond to  
276 wing models with a very strong choice, and appear to show little discrimination when presented  
277 with *H. timareta* females showing the same wing pattern, suggesting that additional short-range  
278 cues do not play a strong role in *H. melpomene* males courtship decision. By contrast, *H. cydno*  
279 or *H. heurippa* males show some discrimination against *H. melpomene* models, but it is weaker  
280 than for *H. melpomene* males [30, 35], and choice is generally enhanced by real-females cues.  
281 Moreover, in the mimetic Peruvian pair, *H. t. thelxinoe* males strongly prefer conspecific  
282 females over heterospecific females using close range chemical cues.

283  
284 At intermediate and at low divergence, a limited amount of reproductive isolation due to male  
285 courtship behaviour is sometimes observed ( $RI_{male\ choice} = 0.5-0.78$  and 0-0.4, respectively)  
286 although the strength of isolation is generally weaker and more asymmetric than at high  
287 divergence.

288

289 **Mating experiments: full male-female interaction**

290 At high divergence, the total index of sexual isolation is high for all pairs and in both directions  
 291 of crosses ( $RI_{mating}=0.78-1$ , Table 1).  $RI$  estimated using realised mating is higher than when  
 292 estimated based on visual cues or short range cues from virgin females, suggesting that female  
 293 response and contact interactions (beyond male courtship) also contribute to pre-mating  
 294 isolation, especially for the mimetic pairs (preventing  $T \times M$  heterospecific mating for instance).  
 295

296 At intermediate divergence, isolation is generally high, though asymmetric, such as between *H.*  
 297 *c. cordula* and *H. heurippa* ( $RI_{mating}=0.56/0.98$ ) or between Panamanian and Guianan allopatric  
 298 populations of *H. melpomene* ( $RI_{mating}=0.65/1$ ).  $RI$  estimated on total mating is again higher  
 299 than  $RI$  estimated on experiments with models, suggesting that close-range cues and male-  
 300 female interactions may also be relevant at intermediate divergence.  
 301

302 By contrast, at low divergence between the parapatric races *H. t. florencia* and *H. t. linaresi*,  
 303 reproductive isolation is much lower. It is observed only in one direction ( $T \times M$ ,  $RI_{mating}=0.48$ )  
 304 and largely explained by colour pattern preference.  
 305  
 306

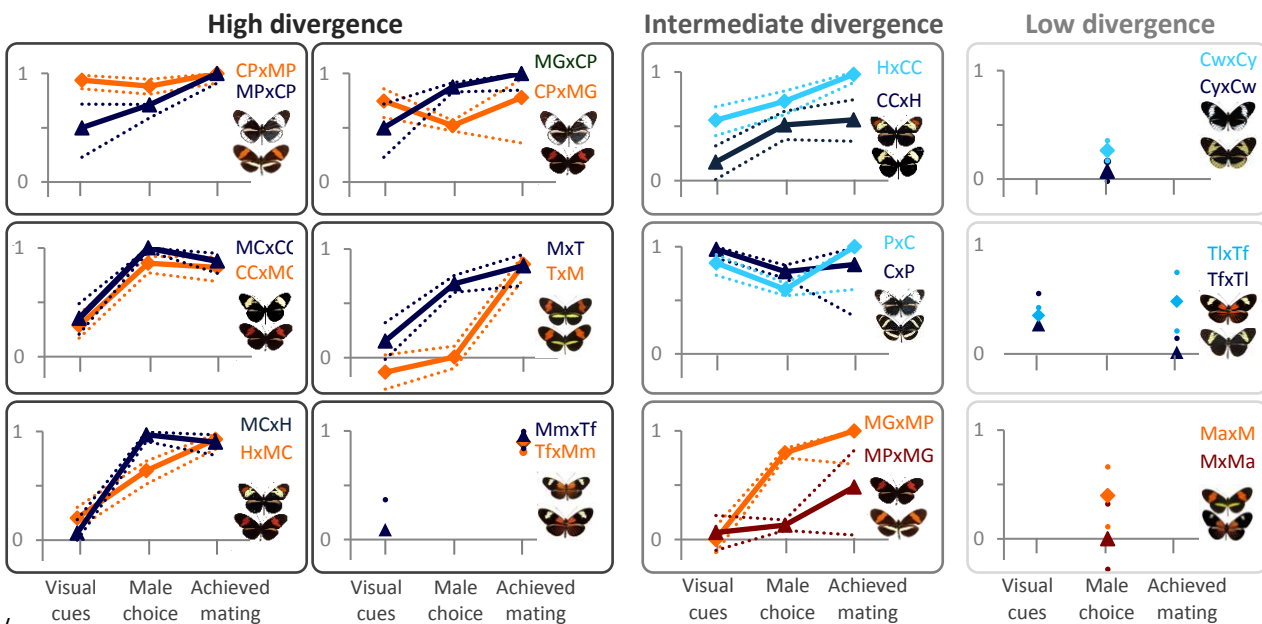

307

308 **Figure 3: Level of RI associated with each behavioural pre-mating barrier to gene flow**

309 For each pair of species, the two colours correspond to the two possible directions of heterospecific  
 310 mating with the female given first. Dotted lines are the confidence intervals.

311

312

313

## 314 *Post-mating isolating barriers*

### 315 Hatch rate of F<sub>1</sub> hybrids: cytoplasmic incompatibilities

316 At high divergence, F<sub>1</sub> hybrids show no significant reduction of hatch rate (Table S1, S2).

### 317 Larval fitness of F<sub>1</sub> broods: host-plant adaptation

318 Oviposition preferences for different *Passiflora* hosts generally constitute an axis of  
319 differentiation between the melpomene and the cydno clade, *H. melpomene* being generally  
320 more specialised than its local cydno-clade counterpart [20, 31, 55] with some exception in  
321 Colombia where *H. melpomene* has a diverse range of oviposition plants [56].

322

323 Hybrid larval survival has only been tested in three pairs at high divergence but shows no  
324 significant reduction of survival, leading to a null contribution to reproductive isolation. This  
325 suggests neither hybrid viability breakdown related to genetic incompatibilities nor incapacity  
326 to metabolize the host-plant are acting in these pairs. For the experiment on hybrids between  
327 *H. c. cordula*/*H. m. melpomene* and *H. heurippa*/*H. m. melpomene* (Table S5), this result  
328 corresponds to expectations since the hybrids were fed on a common host-plant (*P. oesterdii*).  
329 However, this may be surprising for the Peruvian pair *H. t. thelxinoe*/*H. m. amaryllis*, which  
330 was fed on the maternal host-plant (Table S2).

331

332 Testing survival in experimental conditions with unlimited access to food, fewer parasites and  
333 no competition might have underestimated the importance of efficient host-plant use in hybrid  
334 growth. We can note for instance, that, in semi-natural conditions, early stage *H. melpomene*  
335 larvae from central America had a higher survival rate on *P. menispermifolia* than on other  
336 *Passiflora* species [55] while in insectaries, similar growth rates have been achieved for various  
337 species of *Passiflora* (Smiley 1978). In Peru, several preliminary attempts of feeding *H. m.*  
338 *amaryllis* larvae and some hybrids (back-crosses towards *H. m. amaryllis*) with *P. edulis* or *P.*  
339 *granadilla* (well-accepted by *H. t. thelxinoe*) led to higher mortality rate.

340

### 341 F<sub>1</sub> adult survival

342 Adult mortality due to predation was estimated only for the hybrids between *H. c. chioneus* x  
343 *H. m. rosina*. Its contribution to isolation was significant with  $RI = 0.35$ , but lower than that  
344 due to pre-mating barriers.

345

346 In the co-mimetic pairs, F<sub>1</sub> hybrids are visually similar to the parents and predation is not  
347 expected to participate in reproductive isolation.

348

349 In other cases, F<sub>1</sub> hybrids may also be similar to one parent (*H. c. galanthus* X *pachinus* hybrids  
350 being like *H. c. galanthus* [23], *H. heurippa* X *H. m. melpomene* hybrids being similar to *H. m.*  
351 *melpomene* [29], and heterozygotes at the K locus determining white or yellow morph of the  
352 polymorphic taxa *H. cydno alithea* are white (Chamberlain *et al*, 2009)), which introduces  
353 asymmetry in isolation because they are expected to survive better in one habitat. For instance,  
354 mark-resight experiments on *H. cydno alithea* (Kapan, 2001) let us estimate predation against

355 white morphs in areas dominated by the yellow mimic, suggesting a mean  $RI_{adult\ survival}$  due to  
356 predation against F<sub>1</sub> hybrids around 0.19 (0.38 in areas dominated by yellow, 0 in areas  
357 dominated by white).  
358

#### 359 F<sub>1</sub> mating ability: sexual selection against F<sub>1</sub> hybrid

360 At high divergence, in non-mimetic as well as co-mimetic pairs, mate discrimination against F<sub>1</sub>  
361 hybrids appears as an additional isolating barrier although its strength is highly variable and  
362 asymmetric, depending on which parental partner is tested ( $RI_{F_1\ success}=0-0.87$ , Table 1, Table  
363 S3-4, S6-7).

364

365 At intermediate divergence, mating discrimination against F<sub>1</sub> hybrids is also observed for *H. c.*  
366 *galanthus* x *H. pachinus*. Those hybrids are white like *H. c. galanthus* and F<sub>1</sub> wing models get  
367 as much approaches from *H. c. galanthus* males as the pure species, whereas they are  
368 discriminated against by *H. pachinus* males, resulting in asymmetric isolation  
369 ( $RI_{F_1\ success}=0/0.94$ ).  
370

370

#### 371 Fertility of F<sub>1</sub> broods: hybrid incompatibilities

372 At high divergence, the estimated isolating strength of hybrid sterility is intermediate compare  
373 to other factors, ranging from 0.33 to 0.49 in one direction and from 0 to 0.33 in the other  
374 direction (Table 1, Fig. 2). F<sub>1</sub> hybrid males are fully fertile except for *H. c. chioneus* (Panama)  
375 X *H. m. melpomene* (French Guiana) males which show a slight reduction in fertility [32].  
376 Female F<sub>1</sub> fertility is more complex. All studies involving crosses between a *H.*  
377 *cydno/heurippa/timareta* mother and a *melpomene* father found complete sterility of female F<sub>1</sub>  
378 (Table S2)[29, 32]. In the other direction of crosses, i.e. a *melpomene* mother x  
379 *cydno/timareta/heurippa* father, F<sub>1</sub> fertility is highly variable. At the extremes, all *H. m.*  
380 *melpomene* X *H. heurippa* females tested were fully fertile [29] whereas *H. m. melpomene*  
381 (French Guiana) X *H. c. chioneus* (Panama) females were all sterile [32]. For most other pairs,  
382 partial fertility was reported [24, 32] (Table S8) with intriguing non-uniform pattern. For  
383 instance, in *H. melpomene* X *H. timareta* hybrids, some hybrid females had a lower fertility,  
384 compared with pure females, while others were completely sterile and others completely fertile  
385 (Table S2).  
386

386

387 At intermediate or low divergence, no significant reduction of fertility was found for the  
388 parapatric pairs investigated, neither for *H. heurippa* X *H. c. cordula* [29] nor *H. t. florenciac* X  
389 *H. t. linaresei* hybrids [24]. The exception is the allopatric pair *H. m. rosina* (Panama)/*H. m.*  
390 *melpomene* (French Guiana) since the F<sub>1</sub> female (and possibly males) hybrids showed a lower  
391 fertility [57], resulting in an additional barrier of 0.43 only for one direction ( $MPxMG$ ).  
392

392

393

## 394 Discussion

395 Quantifying reproductive isolation throughout a speciose clade of *Heliconius* butterflies shows  
396 that different levels of genetic divergence correspond to marked quantitative and qualitative  
397 differences in reproductive isolation. Higher divergence is associated with both the  
398 accumulation of additional barriers and the strengthening of a common set of barriers, although  
399 some axes of differentiation are quite labile depending on the ecological context.

400  
401 The diversity of taxa at different levels of divergence and strengths of RI has been characterised  
402 as a ‘speciation continuum’. This does not necessarily imply that these actually represent  
403 sequential stages in speciation, nor that any particular example is on an inevitable path towards  
404 complete speciation. For example, different stages might be at equilibrium between divergence  
405 and gene flow or correspond to qualitatively different pathways to differentiation. Nevertheless,  
406 the ‘speciation continuum’ is useful and perhaps analogous to the manner in which those  
407 studying the evolution of complex structures, such as the eye or the flagellum, infer past  
408 evolutionary trajectories from the comparative study of apparently intermediate structures in  
409 extant animals. Such examples provide support for the plausibility of a particular route towards  
410 a complex structure, or in the present case a route towards complete speciation, but do not prove  
411 that any particular evolutionary route has been taken in nature. Our analysis therefore allows  
412 assessment of the roles that different factors might take in shaping divergence, while accepting  
413 that the current array of divergence states does not necessarily represent successive stages along  
414 a unique path to speciation.

415

### 416 *Is reproductive isolation driven by a single trait or multidimensional factors?*

417 Isolation in the face of gene flow requires that certain factors counter the effects of  
418 recombination between alleles that characterise diverging taxa [10, 58-60]. This might include  
419 strong disruptive selection on a single (large-effect) trait [61], an association between ecological  
420 divergence and reproductive isolation (via a ‘magic’ trait for instance [39]), or the coupling of  
421 several isolating barriers [58]. Diverging *Heliconius* taxa showing a shift in colour pattern meet  
422 all those criteria, making colour pattern divergence a major initiator and driver of reproductive  
423 isolation in this group [38, 62].

424

425 Given that colour-pattern differentiation underlies the main isolating barriers (predation, mate  
426 choice, habitat partitioning) and that all those barriers operate at low, intermediate and high  
427 divergence, one may wonder whether increased isolation results from the “stronger selection”  
428 scenario [61], under which barriers associated with colour pattern differences are strengthened  
429 along the continuum of divergence. This is the case, for instance, in *Pundamilia* cichlid fish, in  
430 which increased isolation is associated with increased divergence on one main axis of  
431 differentiation, male coloration in relation with habitat transparency [63]. The alternative  
432 hypothesis would be that increased isolation is the product of “multifarious selection” [61], with  
433 the addition of independent traits and more isolating barriers at higher divergence [64, 65]. For  
434 instance, between colour-pattern races of poison frog, isolation is much higher for a pair which  
435 also exhibit size differences associated with habitat specialization [66].

436

437 Those predictions can be tested by comparing the strength of the barriers potentially associated  
438 with colour pattern divergence along the *Heliconius* continuum. The lower stages of divergence  
439 reported in *Heliconius* correspond to wing-pattern races, for which selection causes genetic  
440 differentiation only around wing-patterning loci [48] and maintain weak isolation. At this stage,  
441 selection on different mimicry associations maintains spatial segregation through predation  
442 against migrants [42], and is likely to cause post-mating isolation through predation against  
443 non-mimetic hybrids. The third barrier, male preference based on colour, is already acting at  
444 low-divergence but its contribution is variable and asymmetric. What is the fate of those barriers  
445 at higher divergence? Isolation due to **predation** against hybrids has not been quantified in  
446 many pairs of taxa. It does appear stronger for the *H. c. chioneus* x *H. m. rosina* hybrids (high  
447 divergence), than for *H. c. alithea* F<sub>1</sub> (low divergence) for instance. It is worth noting that  
448 predation itself is of the same magnitude in both cases, reducing the survival of any deviant  
449 form by about 30%. RI due to predation is thus lower in *C. alithea* hybrids because they are  
450 similar to one parent (white) while *H. c. chioneus* x *H. m. rosina* hybrids differ from both  
451 parents and suffer from predation in all habitats. Therefore, isolation against hybrids depends  
452 on dominance and segregation of colour patterns in hybrids, with the hybrid being generally  
453 more different at higher level of divergence (except for the mimetic pairs). **Habitat isolation**  
454 gets stronger at high divergence. Just like for pairs of taxa at low divergence, fine-scale  
455 partitioning between taxa at high divergence may follow the distribution of their co-mimics, as  
456 observed for instance between *H. c. chioneus* and *H. m. rosina* across the transition from closed  
457 forest to disturbed forest and edge habitat [37]. However, habitat specialization for closed forest  
458 habitat is also exhibited by other members of the cydno clade such as *H. timareta* (co-mimic  
459 with *H. melpomene*) or *H. heurippa* (which has no co-mimic), suggesting that spatial  
460 partitioning at high divergence is not only conditioned by mimicry, but also by other ecological  
461 preferences which remain unknown but may involve abiotic conditions, adaptation to altitude  
462 or host-plants. The component of **mate choice** clearly attributable to visual cues, deduced from  
463 experiments with models, is generally strengthened at high and intermediate divergence, though  
464 not consistently between species. In addition, assortative mating is likely to involve a chemical  
465 component for most pairs of taxa at high divergence. Again, as hybrids tend to be quite different  
466 from parental species at higher divergence, sexual selection against hybrids is also stronger at  
467 high divergence. Overall, increased isolation does involve a strengthening of isolating barriers  
468 directly linked to colour pattern differences, but higher RI also rests largely on the addition of  
469 other isolating dimensions.

470  
471 To assess the relative importance of colour pattern shift at later stages of speciation, it is also  
472 useful to consider species pairs that do not exhibit colour pattern divergence, such as the co-  
473 mimics *H. timareta* and *H. melpomene*. Genomic evidence suggests that these species were  
474 initially divergent in colour pattern and became co-mimics after secondary introgression of  
475 wing pattern alleles from *H. melpomene* into *H. timareta* [67, 68]. Under this scenario, if colour  
476 pattern divergence plays an important role in the isolation of species at higher divergence,  
477 reproductive isolation is expected to be weakened secondarily by mimicry and gene flow. Such  
478 collapse of differentiation has sometimes been observed, notably between pairs of taxa that rely  
479 on one main axis of differentiation, habitat-related for instance [69]. Compared with *H. c.*  
480 *chioneus* and *H. m. rosina*, the co-mimics *H. t. thelxinoe* and *H. m. amaryllis* indeed display a

481 ~2% reduction of total estimated RI and a slightly lowered genomic divergence [21]. Both in  
482 the Colombian and Peruvian mimetic pairs, natural hybrids are also marginally more frequent  
483 (1-3%) [20, 31, 70]. This reduction of RI between co-mimics follows the prediction but shows  
484 that lifting the wing-pattern barrier has a rather limited effect on species differentiation because  
485 RI relies on multiple other isolating mechanisms (habitat specialisation, assortative mating  
486 based on chemical communication [34], partial hybrid sterility and likely host-plant  
487 divergence). This implies that reproductive isolation between pairs at high level of divergence  
488 is strong enough to allow the secondary loss of certain barriers to gene flow, in this case through  
489 introgression of wing-pattern alleles, without compromising genome-wide differentiation. It  
490 supports the hypothesis that multiple diverging dimensions add cumulatively to reproductive  
491 isolation and favour the completion of speciation in the face of gene flow [61].  
492

### 493 *How do isolating mechanisms evolve?*

494 The continuum of reproductive isolation spanned in this study also corresponds to a continuum  
495 of time since divergence, raising the questions of how the multiple barriers accumulate through  
496 time, which result from selection, which are a by-product of isolation through drift, and what is  
497 the relative importance of ecological and non-ecological processes.  
498

499 Pre-mating sexual isolation stands out as one of the strongest barriers at all levels of divergence  
500 and gets stronger along the continuum of divergence. This observation is consistent with the  
501 rapid evolution of pre-mating isolation generally reported for speciation with gene flow [2], in  
502 fish [9, 71], drosophila [51] or plants [64]. As for darter fish [72], the rapid evolution of strong  
503 assortative mating in *Heliconius* appears to be associated with sexual selection, notably for  
504 chemosensory traits [73] which, as indicators of mate quality, are common targets of sexual  
505 selection [74].  
506

507 An increase in pre-zygotic isolation between hybridizing populations may also reflect  
508 reinforcement, under selection against interspecific mating [75]. In *Drosophila* for instance, the  
509 fast evolution of mate choice has been linked to reinforcement processes, with pre-mating  
510 isolation being stronger for pairs with geographic overlap [51] and pairs with higher  
511 hybridization costs [76]. Here, higher stages of divergence are characterized by a decrease in  
512 hybrid fitness, such that stronger pre-mating isolation may reflect stronger selection against  
513 hybridization. In addition, the higher geographic overlap seen in pairs at high divergence also  
514 provides more opportunities for selection against hybridisation to operate. Evidence for  
515 reinforcement comes from higher pre-mating isolation observed in the sympatric *H. c.*  
516 *chioneus/H. m. rosina* than in the allopatric *H. c. chioneus/H. m. melpomene* (French Guiana)  
517 as well as an increased mate choice between *H. c. galanthus* and *H. pachinus* in populations  
518 close to the contact zone [27].  
519

520 Under a hypothesis of reinforcement, pre-mating isolation comes as a response to hybrid  
521 unfitness, so it may seem paradoxical to observe rather weak or moderate post-mating barriers.  
522 It could be that their current contributions do not reflect their past importance or that the  
523 accumulation of several weak barriers is sufficient to select for assortative mating. Our analysis  
524 may also underestimate the strength of extrinsic post-mating barriers, which are experimentally

525 more difficult to assess. Notably, little is known about the ecology of hybrids, and poor hybrid  
526 performance may represent a significant barrier when parental species have markedly different  
527 habitat preferences (e.g. altitude between *H. timareta* and *H. melpomene*).

528  
529 Habitat specialisation associated with fine-scale spatial segregation and host-plant divergence  
530 is observed for all pairs at high divergence but for none at low divergence. Interestingly, species  
531 at intermediate divergence do not show clear habitat or host-plant differences either, suggesting  
532 that habitat specialisation might be one of the key barriers allowing geographic overlap and  
533 leading to high divergence. Such a transition from parapatric, ecologically-similar morphs to  
534 overlapping habitat-specialized taxa is also reported along the stickleback speciation continuum  
535 [9] and perhaps constitutes a tipping point in the evolution of isolation[13].

536  
537 The last post-mating barrier widely observed at high divergence but generally absent at lower  
538 levels of divergence is hybrid female sterility (with the exception of allopatric races of *H.*  
539 *melpomene* [57], at intermediate divergence). This result is quite general in the literature: when  
540 speciation occurs with gene flow, post-mating incompatibilities tend to accumulate more slowly  
541 than ecological and pre-mating isolation [51, 71, 77], and follow Haldane's rule by first  
542 affecting the heterogametic sex [78]. Generally, the strongest isolation was found between  
543 allopatric pairs coming from distant areas (Panama VS French Guiana) whereas in sympatry,  
544 F<sub>1</sub> female sterility can be variable, from fully sterile to fully fertile, suggesting that sterility is  
545 variably affected by local gene flow. *Heliconius* female sterility is typically caused by  
546 interactions between the Z chromosome and autosomal loci [29, 32, 57]. Among sympatric  
547 pairs of taxa at high divergence such as *H. timareta* and *H. melpomene* or *H. cydno* and *H.*  
548 *melpomene*, Z chromosomes are very divergent while autosomes show a strong signal of  
549 admixture [21]. Admixture might prevent the accumulation of incompatibilities on autosomes  
550 (or may allow its purge following secondary contact), therefore limiting the evolution of female  
551 sterility. Such hypothesis would question the stability of this intrinsic barrier, traditionally  
552 assumed to be irreversible.

## 553 Conclusion

554 In summary, we have quantified most of the known components of reproductive isolation across  
555 a recent adaptive radiation. Contrasting pairs of hybridizing taxa showing different levels of  
556 divergence suggests that speciation involves the strengthening of some isolating barriers but,  
557 importantly, seems to require the accumulation of additional barriers. Indeed, the synergistic  
558 action of wing pattern shifts and other isolating mechanisms appears to be important for  
559 reproductive isolation in *Heliconius*, especially at early stages of divergence. Nevertheless, the  
560 case of co-mimetic hybridizing species reveals that certain isolating barriers, and especially  
561 wing pattern differences, may in fact be quite labile or partially reversible. This shows that a  
562 seemingly key factor in the early stages of differentiation may have its role taken over by other  
563 barriers at later stages of divergence. A key promoter of the stability and completion of species  
564 divergence thus appears to be the multidimensionality of reproductive isolation.

565



## 566 **Author's contributions**

567 CM and MJ designed the analysis, and the study of the Peruvian taxa. CM performed the meta-  
568 data analysis and the new data acquisition on the Peruvian species. CS performed the new data  
569 acquisition on the Colombian species. RM and CJ studied the Panamanian species. CM and MJ  
570 wrote the manuscript with contributions from all authors. All authors gave final approval for  
571 publication.

## 572 **Acknowledgments**

573 This clade-comparison has been made possible thanks to all the experiments and investigations  
574 led by *Heliconius* researchers in the past years. We are grateful to them for allowing us to re-  
575 analyse their data. We thank the Museo de Historia Natural de Lima, the Ministerio de la  
576 Agricultura, the SERNANP-BPAM and PEHCBM-ACR for collection and export permits in  
577 Peru. We thank Marianne Elias for constructive and helpful comments on this manuscript.

## 579 **Funding**

580 This work was supported by an ERC Starting Grant (MimEvol) to MJ. CS was funded by the  
581 Universidad del Rosario FIUR grant QDN-DG001. RM was funded by a Research Fellowship  
582 at King's College, Cambridge.

## 584 **References**

- 585
- 586 [1] Sobel, J.M., Chen, G.F., Watt, L.R. & Schemske, D.W. 2009 The Biology of Speciation.  
587 *Evolution* **64**, 295-315. (doi:10.1111/j.1558-5646.2009.00877.x).
- 588 [2] The Marie Curie Speciation Network. 2012 What do we need to know about speciation?  
589 *Trends Ecol. Evol.* **27**, 27-39. (doi:10.1016/j.tree.2011.09.002).
- 590 [3] Seehausen, O., Butlin, R.K., Keller, I., Wagner, C.E., Boughman, J.W., Hohenlohe, P.A.,  
591 Peichel, C.L., Saetre, G.-P., Bank, C., Brannstrom, A., et al. 2014 Genomics and the origin of  
592 species. *Nat. Rev. Genet.* **15**, 176-192. (doi:10.1038/nrg3644).
- 593 [4] Kirkpatrick, M., & Ravigné, V. 2002 Speciation by natural and sexual selection: models  
594 and experiments. *The American Naturalist* **159**, S22-S35.
- 595 [5] Coyne, J.A. & Orr, H.A. 2004 In *Speciation*. (Sunderland, MA: Sinauer Associates).
- 596 [6] Sobel, J.M. & Chen, G.F. 2014 Unification of methods for estimating the strength of  
597 reproductive isolation. *Evolution* **68**, 1511-1522. (doi:10.1111/evo.12362).
- 598 [7] Shaw, K.L. & Mullen, S.P. 2011 Genes versus phenotypes in the study of speciation.  
599 *Genetica* **139**, 649-661. (doi:10.1007/s10709-011-9562-4).
- 600 [8] Butlin, R.K., Galindo, J. & Grahame, J.W. 2008 Sympatric, parapatric or allopatric: the  
601 most important way to classify speciation? *Philos. Trans. R. Soc. B-Biol. Sci.* **363**, 2997-3007.  
602 (doi:10.1098/rstb.2008.0076).
- 603 [9] Hendry, A.P., Bolnick, D.I., Berner, D. & Peichel, C.L. 2009 Along the speciation  
604 continuum in sticklebacks. *Journal of Fish Biology* **75**, 2000-2036. (doi:10.1111/j.1095-  
605 8649.2009.02419.x).
- 606 [10] Via, S. 2001 Sympatric speciation in animals: the ugly duckling grows up. *Trends Ecol.*  
607 *Evol.* **16**, 381-390.
- 608 [11] Jiggins, C.D. & Mallet, J. 2000 Bimodal hybrid zones and speciation. *Trends Ecol. Evol.*  
609 **15**, 250-255. (doi:10.1016/s0169-5347(00)01873-5).

- 610 [12] Seehausen, O. & Wagner, C.E. 2014 Speciation in Freshwater Fishes. *Annual Review of*  
611 *Ecology, Evolution, and Systematics* **45**, 621-651. (doi:10.1146/annurev-ecolsys-120213-  
612 091818).
- 613 [13] Nosil, P., Feder, J.L., Flaxman, S.M. & Gompert, Z. 2017 Tipping points in the dynamics  
614 of speciation. *Nature Ecology & Evolution* **1**.
- 615 [14] Roux, C., Fraise, C., Romiguier, J., Anciaux, Y., Galtier, N. & Bierne, N. 2016 Shedding  
616 light on the grey zone of speciation along a continuum of genomic divergence. *PLOS Biology*  
617 **14**, e2000234.
- 618 [15] Merrill, R., Dasmahapatra, K., Davey, J., Dell'Aglio, D., Hanly, J., Huber, B., Jiggins, C.,  
619 Joron, M., Kozak, K. & Llaurens, V. 2015 The diversification of *Heliconius* butterflies: what  
620 have we learned in 150 years? *J. Evol. Biol.* **28**, 1417-1438.
- 621 [16] Kozak, K.M., Wahlberg, N., Neild, A., Dasmahapatra, K.K., Mallet, J. & Jiggins, C.D.  
622 2014 Multilocus Species Trees Show the Recent Adaptive Radiation of the Mimetic *Heliconius*  
623 Butterflies. *bioRxiv*.
- 624 [17] Nadeau, N.J., Martin, S.H., Kozak, K.M., Salazar, C., Dasmahapatra, K.K., Davey, J.W.,  
625 Baxter, S.W., Blaxter, M.L., Mallet, J. & Jiggins, C.D. 2013 Genome-wide patterns of  
626 divergence and gene flow across a butterfly radiation. *Mol. Ecol.* **22**, 814-826.  
627 (doi:10.1111/j.1365-294X.2012.05730.x).
- 628 [18] Mallet, J. 2007 Hybrid speciation. *Nature* **446**, 279-283.
- 629 [19] Kronforst, M.R., Young, L.G., Blume, L.M. & Gilbert, L.E. 2006 Multilocus analyses of  
630 admixture and introgression among hybridizing *Heliconius* butterflies. *Evolution* **60**, 1254-  
631 1268. (doi:10.1554/06-005.1).
- 632 [20] Mérot, C., Mavarez, J., Evin, A., Dasmahapatra, K., Mallet, J., Lamas, G. & Joron, M.  
633 2013 Genetic differentiation without mimicry shift in a pair of hybridizing *Heliconius* species  
634 (Lepidoptera : Nymphalidae). *Biol. J. Linn. Soc.* **109**, 830-847.
- 635 [21] Martin, S.H., Dasmahapatra, K.K., Nadeau, N.J., Salazar, C., Walters, J.R., Simpson, F.,  
636 Blaxter, M., Manica, A., Mallet, J. & Jiggins, C.D. 2013 Genome-wide evidence for speciation  
637 with gene flow in *Heliconius* butterflies. *Genome Res.* **23**, 1817-1828.  
638 (doi:10.1101/gr.159426.113).
- 639 [22] Chamberlain, N.L., Hill, R.I., Kapan, D.D., Gilbert, L.E. & Kronforst, M.R. 2009  
640 Polymorphic Butterfly reveals the missing link in ecological speciation. *Science* **326**, 847-850.
- 641 [23] Kronforst, M.R., Young, L.G., Kapan, D.D., McNeely, C., O'Neill, R.J. & Gilbert, L.E.  
642 2006 Linkage of butterfly mate preference and wing color preference cue at the genomic  
643 location of wingless. *Proc. Natl. Acad. Sci. USA* **103**, 6575-6580.
- 644 [24] Sanchez, A., Pardo-Diaz, C., Munoz, A., Jiggins, C., Salazar, C. & Linares, M. 2015 An  
645 introgressed wing patterning gene acts as a mating cue. *Evolution*.
- 646 [25] Arias, C., Giraldo, N., McMillan, W., Lamas, G., Jiggins, C.D. & Salazar, C. accepted  
647 New subspecies in a *Heliconius* butterfly adaptive radiation (Lepidoptera: Nymphalidae). .  
648 *Zool. J. Linn. Soc.*
- 649 [26] Merrill, R.M., Gompert, Z., Dembeck, L.M., Kronforst, M.R., McMillan, W.O. & Jiggins,  
650 C.D. 2011 Mate preference across the speciation continuum in a clade of mimetic butterflies.  
651 *Evolution* **65**, 1489-1500. (doi:10.1111/j.1558-5646.2010.01216.x).
- 652 [27] Kronforst, M.R., Young, L.G. & Gilbert, L.E. 2007 Reinforcement of mate preference  
653 among hybridizing *Heliconius* butterflies. *J. Evol. Biol.* **20**, 278-285. (doi:10.1111/j.1420-  
654 9101.2006.01198.x).
- 655 [28] Mavarez, J., Salazar, C.A., Bermingham, E., Salcedo, C., Jiggins, C.D. & Linares, M. 2006  
656 Speciation by hybridization in *Heliconius* butterflies. *Nature* **441**, 868-871.
- 657 [29] Salazar, C.A., Jiggins, C.D., Arias, C.F., Tobler, A., Bermingham, E. & Linares, M. 2005  
658 Hybrid incompatibility is consistent with a hybrid origin of *Heliconius heurippa* Hewitson from  
659 its close relatives, *Heliconius cydno* Doubleday and *Heliconius melpomene* Linnaeus. *J. Evol.*  
660 *Biol.* **18**, 247-256.

- 661 [30] Jiggins, C.D., Naisbit, R.E., Coe, R.L. & Mallet, J. 2001 Reproductive isolation caused by  
662 colour pattern mimicry. *Nature* **411**, 302-305.
- 663 [31] Giraldo, N., Salazar, C., Jiggins, C.D., Birmingham, E. & Linares, M. 2008 Two sisters in  
664 the same dress: *Heliconius* cryptic species. *BMC Evol. Biol.* **8** 324.
- 665 [32] Naisbit, R.E., Jiggins, C.D., Linares, M., Salazar, C. & Mallet, J. 2002 Hybrid sterility,  
666 Haldane's rule and speciation in *H. cydno* and *H. melpomene*. *Genetics* **161**, 1517-1526.
- 667 [33] Naisbit, R.E., Jiggins, C.D. & Mallet, J. 2001 Disruptive sexual selection against hybrids  
668 contribute to speciation between *Heliconius cydno* and *Heliconius melpomene*. *Proc. R. Soc. B-  
669 Biol. Sci.* **268**, 1849-1854.
- 670 [34] Mérot, C., Frérot, B., Leppik, E. & Joron, M. 2015 Beyond magic traits: Multimodal  
671 mating cues in *Heliconius* butterflies. *Evolution* **69**, 2891-2904.
- 672 [35] Merrill, R.M., Schooten, B.V., Scott, J.A. & Jiggins, C.D. 2010 Pervasive genetic  
673 associations between traits causing reproductive isolation in *Heliconius* butterflies. *Proc. R.  
674 Soc. B-Biol. Sci.*
- 675 [36] Merrill, R.M., Wallbank, R.W.R., Bull, V., Salazar, P.C.A., Mallet, J., Stevens, M. &  
676 Jiggins, C.D. 2012 Disruptive ecological selection on a mating cue. *Proc. R. Soc. B-Biol. Sci.*  
677 **279**, 4907-4913. (doi:10.1098/rspb.2012.1968).
- 678 [37] Estrada, C. & Jiggins, C.D. 2002 Patterns of pollen feeding and habitat preference among  
679 *Heliconius* species. *Ecol. Entomol.* **27**, 448-456.
- 680 [38] Jiggins, C.D. 2008 Ecological speciation in mimetic butterflies. *Bioscience* **58** No 6, 541-  
681 548.
- 682 [39] Servedio, M.R., Van Doorn, G. S., Kopp, M., Frame, A. M., & Nosil, P. . 2011 Magic  
683 traits in speciation: 'magic' but not rare? *Trends Ecol. Evol.* **26**, 389-397.
- 684 [40] Gavrillets, S. 2004 *Fitness Landscapes and the Origin of Species.*, Princeton University  
685 Press,.
- 686 [41] Kapan, D.D. 2001 Three-butterfly system provides a field test of müllerian mimicry.  
687 *Nature* **409**, 338-340.
- 688 [42] Mallet, J. & Barton, N.H. 1989 Strong Natural-Selection in a Warning-Color Hybrid Zone.  
689 *Evolution* **43**, 421-431. (doi:10.2307/2409217).
- 690 [43] Turner, J.R. 1987 The evolutionary dynamics of batesian and muellerian mimicry:  
691 similarities and differences. (pp. 81-95, Wiley Online Library.
- 692 [44] Chouteau, M., Arias, M. & Joron, M. 2016 Warning signals are under positive frequency-  
693 dependent selection in nature. *Proceedings of the National Academy of Sciences* **113**, 2164-  
694 2169.
- 695 [45] Arias, M., le Poul, Y., Chouteau, M., Boisseau, R., Rosser, N., Théry, M. & Llaurens, V.  
696 2016 Crossing fitness valleys: empirical estimation of a fitness landscape associated with  
697 polymorphic mimicry. *Proc. R. Soc. B-Biol. Sci.* **283**, 20160391.
- 698 [46] Mallet, J. 2010 Shift happens! Shifting balance and the evolution of diversity in warning  
699 colour and mimicry. *Ecol. Entomol.* **35**, 90-104. (doi:10.1111/j.1365-2311.2009.01137.x).
- 700 [47] Mallet, J., Jiggins, C.D. & McMillan, W.O. 1998 Mimicry and warning color at the  
701 boundary between races and species. In Howard, D. J. & Berlocher, S.H. (eds) *Endless Forms:  
702 Species and Speciation.* (pp. pp390-403, Oxford University Press.
- 703 [48] Nadeau, N.J., Ruiz, M., Salazar, P., Counterman, B., Medina, J.A., Ortiz-Zuazaga, H.,  
704 Morrison, A., McMillan, W.O., Jiggins, C.D. & Papa, R. 2014 Population genomics of parallel  
705 hybrid zones in the mimetic butterflies, *H. melpomene* and *H. erato*. *Genome Res.* **24**, 1316-  
706 1333. (doi:10.1101/gr.169292.113).
- 707 [49] Brower, A.V.Z. 1996 A new mimetic species of *Heliconius* (Lepidoptera: Nymphalidae),  
708 from southeastern Colombia, revealed by cladistic analysis of mitochondrial DNA sequences.  
709 *Zool. J. Linn. Soc.* **116**, 317-322.

- 710 [50] Ramsey, J., Bradshaw, H.D. & Schemske, D.W. 2003 Components of reproductive  
711 isolation between the monkeyflowers *Mimulus lewisii* and *M. cardinalis* (Phrymaceae).  
712 *Evolution* **57**, 1520-1534.
- 713 [51] Coyne, J.A. & Orr, H.A. 1989 Patterns of Speciation in *Drosophila*. *Evolution* **43**, 362-  
714 381. (doi:10.2307/2409213).
- 715 [52] Rosser, N., Phillimore, A.B., Huertas, B., Willmott, K.R. & Mallet, J. 2012 Testing  
716 historical explanations for gradients in species richness in heliconiine butterflies of tropical  
717 America. *Biol. J. Linn. Soc.* **105**, 479-497. (doi:10.1111/j.1095-8312.2011.01814.x).
- 718 [53] Mega, N.O. & de Araujo, A.M. 2010 Analysis of the mating behavior and some possible  
719 causes of male copulatory success in *Dryas iulia alcionea* (Lepidoptera, Nymphalidae,  
720 Heliconiinae). *J. Ethol.* **28**, 123-132. (doi:10.1007/s10164-009-0163-y).
- 721 [54] Mallet, J. & Gilbert, L.E. 1995 Why Are There So Many Mimicry Rings - Correlations  
722 between Habitat, Behavior and Mimicry in *Heliconius* Butterflies. *Biol. J. Linn. Soc.* **55**, 159-  
723 180. (doi:10.1111/j.1095-8312.1995.tb01057.x).
- 724 [55] Merrill, R.M., Naisbit, R.E., Mallet, J. & Jiggins, C.D. 2013 Ecological and genetic factors  
725 influencing the transition between host-use strategies in sympatric *Heliconius* butterflies. *J.*  
726 *Evol. Biol.* **26**, 1959-1967. (doi:10.1111/jeb.12194).
- 727 [56] Salazar, C. 2006 Hybrid speciation in animals: Evidence from *Heliconius* butterflies. *PhD,*  
728 *Universidad de los Andes*.
- 729 [57] Jiggins, C.D., Linares, M., Naisbit, R.E., Salazar, C., Yang, Z.H. & Mallet, J. 2001 Sex-  
730 linked hybrid sterility in a butterfly. *Evolution* **55**, 1631-1638.
- 731 [58] Smadja, C.M. & Butlin, R.K. 2011 A framework for comparing processes of speciation in  
732 the presence of gene flow. *Mol. Ecol.* **20**, 5123-5140. (doi:10.1111/j.1365-  
733 294X.2011.05350.x).
- 734 [59] Maynard-Smith, J. 1966 Sympatric speciation. *Am. Nat.* **100**, 637-650.
- 735 [60] Felsenstein, J. 1981 Skepticism towards Santa Rosalia, or why are there so few kinds of  
736 animals?. *Evolution*, 124-138. *Evolution* **35**, 124-138.
- 737 [61] Nosil, P., Harmon, L.J. & Seehausen, O. 2009 Ecological explanations for (incomplete)  
738 speciation. *Trends Ecol. Evol.* **24**, 145-156. (doi:10.1016/j.tree.2008.10.011).
- 739 [62] Mallet, J. 2009 Rapid speciation, hybridization and adaptive radiation in the *Heliconius*  
740 *melpomene* group. In: butlin RK, Bridle JR, Schluter D (eds) speciation and patterns of  
741 diversity. (pp. 177-194, Cambridge University Press, Cambridge).
- 742 [63] Seehausen, O. 2009 *Progressive levels of trait divergence along a 'speciation transect' in*  
743 *the Lake Victoria cichlid fish Pundamilia*. *Ecological Reviews: Speciation and Patterns of*  
744 *Diversity*, 155-176.
- 745 [64] Schemske, D.W. 2010 Adaptation and the origin of species. *The American Naturalist* **176**,  
746 S4-S25.
- 747 [65] Nosil, P., & Sandoval, C. P. 2008 Ecological niche dimensionality and the evolutionary  
748 diversification of stick insects. *PLoS One* **3** (4).
- 749 [66] Twomey, E., Vestergaard, J. S., Venegas, P. J., & Summers, K. 2016 Mimetic Divergence  
750 and the Speciation Continuum in the Mimic Poison Frog *Ranitomeya imitator*. *The American*  
751 *Naturalist* **187**, 205-224.
- 752 [67] *Heliconius Genome Consortium*. 2012 Butterfly genome reveals promiscuous exchange of  
753 mimicry adaptations among species. *Nature* **487**, 94-98.
- 754 [68] Pardo-Diaz C., Salazar C., Baxter S., Mérot C., Figueiredo-Ready W., Joron M., McMillan  
755 W. & C., J. 2012 Adaptive Introgression across Species Boundaries in *Heliconius* Butterflies.  
756 *PLOS Genetics* **8**.
- 757 [69] Seehausen, O., Takimoto, G., Roy, D. & Jokela, J. 2008 Speciation reversal and  
758 biodiversity dynamics with hybridization in changing environments. *Mol. Ecol.* **17**, 30-44.  
759 (doi:10.1111/j.1365-294X.2007.03529.x).

- 760 [70] Mérot, C., Poul, Y.L., Théry, M. & Joron, M. 2016 Refining mimicry: phenotypic variation  
761 tracks the local optimum. *J. Anim. Ecol.* **85**.
- 762 [71] Stelkens, R.B., Young, K.A. & Seehausen, O. 2010 The Accumulation of Reproductive  
763 Incompatibilities in African Cichlid Fish. *Evolution* **64**, 617-632. (doi:10.1111/j.1558-  
764 5646.2009.00849.x).
- 765 [72] Martin, M.D., & Mendelson, T. C. . 2016 The accumulation of reproductive isolation in  
766 early stages of divergence supports a role for sexual selection. *Journal of evolutionary biology*.  
767 *J. Evol. Biol.* **29**, 676-689.
- 768 [73] Estrada, C., Schulz, S., Yildizhan, S. & Gilbert, L.E. 2011 Sexual selection drives the  
769 evolution of antiaphrodisiac pheromones in butterflies. *Evolution* **65**, 2843-2854.  
770 (doi:10.1111/j.1558-5646.2011.01352.x).
- 771 [74] Johansson, B.G. & Jones, T.M. 2007 The role of chemical communication in mate choice.  
772 *Biological Reviews* **82**, 265-289.
- 773 [75] Servedio, M.R. & Noor, M.A.F. 2003 The role of reinforcement in speciation: Theory and  
774 data. *Annu. Rev. Ecol., Evol. Syst.* **34**, 339-364.  
775 (doi:10.1146/annurev.ecolsys.34.011802.132412).
- 776 [76] Yukilevich, R. 2012 Asymmetrical patterns of speciation uniquely support reinforcement  
777 in *Drosophila*. *Evolution* **66**, 1430-1446.
- 778 [77] Stelkens, R.B. & Seehausen, O. 2009 Phenotypic divergence but not genetic distance  
779 predicts assortative mating among species of a cichlid fish radiation. *J. Evol. Biol.* **22**, 1679-  
780 1694. (doi:10.1111/j.1420-9101.2009.01777.x).
- 781 [78] Haldane, J.B. 1922 Sex ratio and unisexual sterility in hybrid animals. *Journal of genetics*  
782 **12**, 101-109.
- 783
- 784
